# Supplementary material for: Bird diversity-environment relationships in urban parks and cemeteries of the Neotropics during breeding and non-breeding seasons
Source: PeerJ journal article supplement (doi:10.7717/peerj.14496), 2022-12-14
Supplement: Figure_S1.docx [file Figure_S1.docx]

Figure S. Boxplots showing the two variables that best discriminated between parks and cemeteries in urban areas of the Neotropics, based of Discriminant function analysis (Correctness rate = 0.8). a) Percent cover of Built, and b) Pedestrian/ 10 minutes.

a)

b)
