# Supplementary material for: Bird diversity-environment relationships in urban parks and cemeteries of the Neotropics during breeding and non-breeding seasons
Source: PeerJ journal article supplement (doi:10.7717/peerj.14496), 2022-12-14
Supplement: Table_S2.docx [file Table_S2.docx]

Table S2. Name, country and type of habitat of sites surveyed.

| City | Site name | Habitat |
| --- | --- | --- |
| Arequipa | Characato | cemetery |
| Arequipa | El Bosque | park |
| Arequipa | La Apacheta | cemetery |
| Arequipa | Selva Alegre | park |
| Buenos Aires | Agronomía | park |
| Buenos Aires | Avellaneda | park |
| Buenos Aires | Chacarita | cemetery |
| Buenos Aires | Flores | cemetery |
| Buenos Aires | Las Heras | park |
| Buenos Aires | Recoleta | cemetery |
| Chilecito | Cementerio Parque | cemetery |
| Chilecito | Cementerio Perpetuo Socorro | cemetery |
| Chilecito | Parque Municipal Arturo Marasso | park |
| Chilecito | Plaza de los mineros | park |
| Curitiba | Boqueirão | cemetery |
| Curitiba | Botanical garden | park |
| Curitiba | Capão da Imbuia | park |
| Curitiba | Jardim da Saudade | cemetery |
| Curitiba | Reinhardt Maack | park |
| La Paz | C general | cemetery |
| La Paz | C jardín | cemetery |
| La Paz | Las Cholas | park |
| La Paz | P Montículo | park |
| Medellín | Cementerio Museo San Pedro | cemetery |
| Medellín | Parque de Los Deseos | park |
| Mendoza | Cementerio de la Ciudad de Mendoza | cemetery |
| Mendoza | Central | park |
| Mexico City | Bosque de Nativitas | park |
| Mexico City | Bosque de San Luis | park |
| Mexico City | Panteon San Francisco | cemetery |
| Mexico City | Panteon San Gregorio | cemetery |
| Mexico City | Panteon Xilotepec | cemetery |
| Mexico City | Panteon Xoco | cemetery |
| Mexico City | Parque Alamedas | park |
| Mexico City | Parque Ludico Macondo | park |
| Porto Alegre | Martim Lutero | cemetery |
| Porto Alegre | Moinhos de Vento | park |
| Porto Alegre | São João | cemetery |
| Porto Alegre | Secretaria da Agricultura | park |
| San José, Costa Rica | Guadalupe, cementerio | cemetery |
| San José, Costa Rica | Guadalupe, parque | park |
| San José, Costa Rica | Moravia, parque | park |
| San José, Costa Rica | Moravia, cementerio | cemetery |
| San José, Costa Rica | Sabanilla | cemetery |
| San José, Costa Rica | Vargas (Sabanilla) | park |
| San Juan | cementerio pocito | cemetery |
| San Juan | cementerio la paz del sur | cemetery |
| San Juan | parque 25 de mayo | park |
| San Juan | parque de Rawson | park |
| San Miguel de Tucumán | Belgrano | park |
| San Miguel de Tucumán | Nougues | park |
| San Miguel de Tucumán | Oeste | cemetery |
| San Miguel de Tucumán | San Agustín | cemetery |
| Santa Fe | Cementerio Municipal | cemetery |
| Santa Fe | Parque Garay | park |
| Santa_Maria | Cemiterio_Santa_Rita | cemetery |
| Santa_Maria | Parque_da_Medianeira | park |
| Santiago de Chile | Cementerio Católico de Maipú | cemetery |
| Santiago de Chile | Cementerio General de Santiago | cemetery |
| Santiago de Chile | Cementerio Metropolitano de Santiago | cemetery |
| Santiago de Chile | Cementerio Parque del Recuerdo | cemetery |
| Santiago de Chile | Parque cerro Primo de Rivera | park |
| Santiago de Chile | Parque Forestal de Santiago | park |
| Santiago de Chile | Parque Santa Mónica | park |
| Santiago de Chile | Plaza de los bomberos | park |
| Sorocaba | Parque das Águas | park |
| Sorocaba | Pax | cemetery |
| Taubaté | SEDES | park |
| Taubaté | Convento | cemetery |
| Taubaté | Jardim das nações | park |
| Taubaté | Municipal | cemetery |
| Xalapa | Palo Verde | cemetery |
| Xalapa | Parque Los Berros | park |
