# Supplementary material for: Bird diversity-environment relationships in urban parks and cemeteries of the Neotropics during breeding and non-breeding seasons
Source: PeerJ journal article supplement (doi:10.7717/peerj.14496), 2022-12-14
Supplement: Table_S3b.docx [file Table_S3b.docx]

Table S2. List of species and their abundances in Neotropical urban parks and cemeteries.

| Species | Abundance |
| --- | --- |
| ***Accipiter sp*** | 3 |
| ***Agelaioides badius*** | 62 |
| ***Aimophila rufescens*** | 5 |
| ***Amazilia beryllina*** | 31 |
| ***Amazilia chionogaster*** | 2 |
| ***Amazilia cyanocephala*** | 6 |
| ***Amazilia tzacatl*** | 13 |
| ***Amazona aestiva*** | 14 |
| ***Amazona albifrons*** | 13 |
| ***Amazonetta brasiliensis*** | 14 |
| ***Anairetes parulus*** | 49 |
| ***Anhinga anhinga*** | 2 |
| ***Anthus lutescens*** | 3 |
| ***Aramides saracura*** | 19 |
| ***Aramus guarauna*** | 1 |
| ***Aratinga mitratus*** | 12 |
| ***Aratinga nenday*** | 75 |
| ***Ardea alba*** | 19 |
| ***Ardea cocoi*** | 2 |
| ***Asio stigius*** | 1 |
| ***Athene cunicularia*** | 12 |
| ***Basileuterus culicivorus*** | 16 |
| ***Basileutrus bivittatus*** | 2 |
| ***Brotogeris chiriri*** | 81 |
| ***Brotogeris tirica*** | 36 |
| ***Bubulcus ibis*** | 23 |
| ***Butorides striatus*** | 1 |
| ***Cacicus haemorrous*** | 2 |
| ***Callipepla californica*** | 12 |
| ***Campephilus melanoleucos*** | 1 |
| ***Camptostoma imberbe*** | 3 |
| ***Camptostoma obsoletum*** | 10 |
| ***Campylopterus curvipennis*** | 1 |
| ***Campylorhynchus zonatus*** | 32 |
| ***Caracara plancus*** | 34 |
| ***Cardellina pusilla*** | 43 |
| ***Cariama cristata*** | 1 |
| ***Certhiaxis cinnamomeus*** | 3 |
| ***Chaetura meridionalis*** | 12 |
| ***Chaetura vauxi*** | 11 |
| ***Chiroxiphia caudata*** | 4 |
| ***Chloroceryle americana*** | 2 |
| ***Chlorospingus flavopectus*** | 4 |
| ***Chlorostilbon lucidus*** | 31 |
| ***Chrysomus ruficapillus*** | 48 |
| ***Coereba flaveola*** | 129 |
| ***Colaptes campestris*** | 21 |
| ***Colaptes melanocholoros*** | 27 |
| ***Colaptes rupicola*** | 13 |
| ***Colibri coruscans*** | 34 |
| ***Colibri serrirostris*** | 7 |
| ***Columba livia*** | 2827 |
| ***Columbina cruziana*** | 148 |
| ***Columbina inca*** | 102 |
| ***Columbina picui*** | 101 |
| ***Columbina talpacoti*** | 123 |
| ***Conirostrum cinereum*** | 31 |
| ***Conopophaga lineata*** | 1 |
| ***Contopus cooperi*** | 2 |
| ***Contopus pertinax*** | 2 |
| ***Contopus sordidulus*** | 1 |
| ***Coragyps atratus*** | 15 |
| ***Cranioleuca pallida*** | 1 |
| ***Cranioleuca pyrrhophia*** | 2 |
| ***Crotophaga ani*** | 11 |
| ***Curaeus curaeus*** | 61 |
| ***Cyanocorax chrysops*** | 4 |
| ***Cyclaris gujanensis*** | 8 |
| ***Cynanthus latirostris*** | 11 |
| ***Dacnis cayana*** | 6 |
| ***Diglossa baritula*** | 3 |
| ***Diglossa carbonaria*** | 18 |
| ***Diuca diuca*** | 249 |
| ***Dives dives*** | 6 |
| ***Dryobates mixtus*** | 7 |
| ***Dryobates scalaris*** | 6 |
| ***Dumetella carolinensis*** | 7 |
| ***Dysithamnus mentalis*** | 6 |
| ***Egretta thula*** | 15 |
| ***Elaenia albiceps*** | 17 |
| ***Elaenia flavogaster*** | 17 |
| ***Elaenia obscura*** | 2 |
| ***Elaenia sp.*** | 1 |
| ***Elaenia spectabilis*** | 9 |
| ***Empidonax hammondii*** | 1 |
| ***Empidonax occidentalis*** | 2 |
| ***Empidonomus varius*** | 2 |
| ***Estrilda astrild*** | 13 |
| ***Eupetomena macroura*** | 27 |
| ***Euphonia affinis*** | 1 |
| ***Euphonia chlorotica*** | 52 |
| ***Euphonia elegantisima*** | 1 |
| ***Euphonia hirundinacea*** | 8 |
| ***Euphonia violacea*** | 1 |
| ***Falco rufigularis*** | 1 |
| ***Falco sparverius*** | 28 |
| ***Fluvicola nengeta*** | 26 |
| ***Forpus xanthopterygius*** | 16 |
| ***Furnarius rufus*** | 743 |
| ***Gallinula galeata*** | 43 |
| ***Geothlypis aequinoctialis*** | 1 |
| ***Geranoaetus polyosoma*** | 2 |
| ***Guira guira*** | 40 |
| ***Haemorhous mexicanus*** | 124 |
| ***Hylocharis chrysura*** | 17 |
| ***Hymenops perspicillatus*** | 2 |
| ***Icterus abeillei*** | 13 |
| ***Icterus galbula*** | 8 |
| ***Icterus graduacauda*** | 2 |
| ***Icterus pyrrhopterus*** | 11 |
| ***Icterus spurius*** | 1 |
| ***Jacana jacana*** | 3 |
| ***Leistes loyca*** | 36 |
| ***Lepidocolaptes angustirostris*** | 30 |
| ***Leptasthenura aegithaloides*** | 5 |
| ***Leptasthenura setaria*** | 19 |
| ***Leptotila rufaxila*** | 4 |
| ***Leptotila verreauxi*** | 13 |
| ***Leucochloris albicollis*** | 5 |
| ***Machetornis rixosa*** | 108 |
| ***Megaceryle torquata*** | 1 |
| ***Megarynchus pitangua*** | 9 |
| ***Melanerpes aurifrons*** | 10 |
| ***Melanerpes cactorum*** | 3 |
| ***Melanerpes candidus*** | 8 |
| ***Melanerpes hoffmannii*** | 14 |
| ***Melanotis caerulescens*** | 1 |
| ***Melopsittacus undulatus*** | 4 |
| ***Melozone fusca*** | 24 |
| ***Mesembrenibis cayanensis*** | 4 |
| ***Metropelia ceciliae*** | 81 |
| ***Microspingus cabanisi*** | 1 |
| ***Microspingus melanoleucus*** | 2 |
| ***Milvago chimachima*** | 1 |
| ***Mimus thenca*** | 3 |
| ***Mimus saturninus*** | 198 |
| ***Mniotilta varia*** | 2 |
| ***Molothrus aeneus*** | 4 |
| ***Molothrus bonariensis*** | 373 |
| ***Molothrus rufoaxillaris*** | 40 |
| ***Myioborus brunniceps*** | 3 |
| ***Myiodinastes maculatus*** | 13 |
| ***Myiodinastes solitarius*** | 1 |
| ***Myiodynastes luteiventris*** | 5 |
| ***Myiothlypis leucoblephara*** | 15 |
| ***Myiozetetes cayanensis*** | 3 |
| ***Myiozetetes similis*** | 65 |
| ***Myopsitta monacha*** | 954 |
| ***Myrtis fanny*** | 4 |
| ***Nycticorax nycticorax*** | 26 |
| ***Oreothlypis celata*** | 2 |
| ***Oreothlypis ruficapilla*** | 13 |
| ***Parabuteo unicinctus*** | 16 |
| ***Pardirallus nigricans*** | 2 |
| ***Paroaria coronata*** | 27 |
| ***Passer domesticus*** | 673 |
| ***Patagioenas flavirostris*** | 41 |
| ***Patagioenas maculosa*** | 475 |
| ***Patagioenas picazuro*** | 378 |
| ***Patagona gigas*** | 1 |
| ***Penelope obscura*** | 3 |
| ***Phalacrocorax brasilianus*** | 45 |
| ***Phalcoboenus chimango*** | 57 |
| ***Pheucticus ludovicianus*** | 1 |
| ***Pheucticus melanocephalus*** | 9 |
| ***Phimosus infuscatus*** | 5 |
| ***Phrygilus punensis*** | 45 |
| ***Phyllomyias fasciatus*** | 7 |
| ***Phytotoma rara*** | 4 |
| ***Phytotoma rutila*** | 6 |
| ***Piaya cayana*** | 8 |
| ***Picumnus cirratus*** | 5 |
| ***Picumnus temminckii*** | 21 |
| ***Pionus maximilianus*** | 1 |
| ***Pipraeidea bonariensis*** | 9 |
| ***Piranga flava*** | 3 |
| ***Piranga ludoviciana*** | 2 |
| ***Piranga rubra*** | 7 |
| ***Pitangus sulphuratus*** | 664 |
| ***Polioptila caerulea*** | 15 |
| ***Polioptila dumicola*** | 8 |
| ***Progne chalybea*** | 36 |
| ***Progne modesta*** | 3 |
| ***Progne tapera*** | 15 |
| ***Psaltriparus minimus*** | 32 |
| ***Psarocolius montezuma*** | 3 |
| ***Pseudoseisura lophotes*** | 15 |
| ***Psilorhinus morio*** | 25 |
| ***Psittacara finschi*** | 15 |
| ***Psittacara leucophthalmus*** | 138 |
| ***Ptiliogonys cinereus*** | 21 |
| ***Pygochelidon cyanoleuca*** | 279 |
| ***Pyrocephalus rubinus*** | 5 |
| ***Pyrrhocoma ruficeps*** | 1 |
| ***Pyrrhura frontalis*** | 7 |
| ***Quiscalus mexicanus*** | 254 |
| ***Regulus calendula*** | 9 |
| ***Rodhopis vesper*** | 29 |
| ***Rosthramus sociabilis*** | 3 |
| ***Rupornis magnirostris*** | 9 |
| ***Saltator atriceps*** | 3 |
| ***Saltator aurantiirostris*** | 11 |
| ***Saltator coerulescens*** | 13 |
| ***Saltator similis*** | 7 |
| ***Sappho sparganurus*** | 5 |
| ***Sephanoides sephaniodes*** | 76 |
| ***Serpophaga subcristata*** | 34 |
| ***Setophaga coronata*** | 43 |
| ***Setophaga nigrescens*** | 2 |
| ***Setophaga petechia*** | 9 |
| ***Setophaga pitiayumi*** | 25 |
| ***Setophaga townsendi*** | 6 |
| ***Setophaga virens*** | 11 |
| ***Sicalis flaveola*** | 127 |
| ***Sicalis luteola*** | 19 |
| ***Sicalis olivascens*** | 20 |
| ***Sicalis uropygialis*** | 4 |
| ***Sphyrapicus varius*** | 2 |
| ***Spinus barbatus*** | 10 |
| ***Spinus atratus*** | 27 |
| ***Spinus magellanica*** | 61 |
| ***Spinus psaltria*** | 23 |
| ***Spinus xanthogastra*** | 7 |
| ***Spizella passerina*** | 1 |
| ***Sporophila caerulescens*** | 1 |
| ***Stelgidopterix serripennis*** | 35 |
| ***Sterna supercilliaris*** | 1 |
| ***Streptopelia decaocto*** | 3 |
| ***Streptoprocne zonaris*** | 7 |
| ***Sturnus vulgaris*** | 106 |
| ***Suiriri suiriri*** | 7 |
| ***Syrigma sibilatrix*** | 3 |
| ***Tachycineta leucopyga*** | 25 |
| ***Tachycineta albiventer*** | 5 |
| ***Tachycineta leucorrhoa*** | 26 |
| ***Thalurania glaucopis*** | 4 |
| ***Thamnophilus caerulecens*** | 1 |
| ***Thamnophilus doliatus*** | 2 |
| ***Thaumastura cora*** | 11 |
| ***Thectocercus acuticaudatus*** | 91 |
| ***Theristicus caudatus*** | 12 |
| ***Thraupis abbas*** | 13 |
| ***Thraupis episcopus*** | 54 |
| ***Thraupis palmarum*** | 16 |
| ***Thraupis sayaca*** | 358 |
| ***Thryomanes bewickii*** | 56 |
| ***Todirostrum cinereum*** | 9 |
| ***Toxostoma curvirostre*** | 4 |
| ***Troglodytes aedon*** | 326 |
| ***Trogon surrucura*** | 1 |
| ***Turdus falcklandii*** | 754 |
| ***Turdus amaurochalinus*** | 57 |
| ***Turdus chiguanco*** | 326 |
| ***Turdus flavipes*** | 5 |
| ***Turdus grayi*** | 60 |
| ***Turdus ignobilis*** | 1 |
| ***Turdus leucomelas*** | 38 |
| ***Turdus migratorius*** | 28 |
| ***Turdus rufiventris*** | 551 |
| ***Turdus rufopalliatus*** | 52 |
| ***Turdus subalaris*** | 3 |
| ***Tyrannus melancholicus*** | 83 |
| ***Tyrannus savana*** | 41 |
| ***Tyrannus vociferans*** | 4 |
| ***Vanellus chilensis*** | 287 |
| ***Vanellus resplendens*** | 23 |
| ***Vireo belli*** | 3 |
| ***Vireo cassini*** | 1 |
| ***Vireo flavoviridis*** | 2 |
| ***Vireo gilvus*** | 2 |
| ***Vireo griseus*** | 3 |
| ***Vireo huttoni*** | 1 |
| ***Vireo olivaceus*** | 1 |
| ***Vireo plumbeus*** | 1 |
| ***Volatinia jacarina*** | 33 |
| ***Xiphorhynchus fuscus*** | 1 |
| ***Zenaida asiatica*** | 50 |
| ***Zenaida auriculata*** | 1388 |
| ***Zenaida macroura*** | 1 |
| ***Zenaida meloda*** | 103 |
| ***Zonotrichia capensis*** | 797 |
